# Supplementary material for: An indirect estimation of the population size of students with high-risk behaviors in select universities of medical sciences: A network scale-up study
Source: PubMed Central journal article supplement (PMC5940232; doi:10.1371/journal.pone.0195364), 2018-05-08
Supplement: pone.0195364.s002.pdf [file pone.0195364.s002.pdf]

دوستی نزدیک که عبارت است از: افرادی که به مدت حداقل ۶ ماه همدیگر را می شناسند و در دوهفته اخیر حداقل یک وعده غذا با هم خورده اند و ۲ ساعت نیز باهم وقت گذرانده اند.

سوالات مربوط به سو مصرف مواد و الکل و مسایل مربوط به آن

| ماده مصرفی                                                                                                                                                                           |  |                              |  |  |
|--------------------------------------------------------------------------------------------------------------------------------------------------------------------------------------|--|------------------------------|--|--|
| -مصرف کننده ترامادول                                                                                                                                                                 |  |                              |  |  |
| ب:ازدیدگاه شما مصرف ترامادول در جامعه دانشجویی به چه میزان مورد قبول است؟<br>کم <input type="checkbox"/> متوسط <input type="checkbox"/> زیاد <input type="checkbox"/>                |  |                              |  |  |
| الف : آیا دوست دانشجویی در دانشگاههای علوم پزشکی تهران/البرز می شناسید که در شش ماه اخیر حداقل یکبار داروای ترامادول را بدون تجویز پزشک مصرف کرده باشد، چه برای تفتن و چه صورت مستمر |  |                              |  |  |
| بله <input type="checkbox"/>                                                                                                                                                         |  | خیر <input type="checkbox"/> |  |  |
| ج: اگر بله لطفا تعداد را در زیر گروههای زیر بیان فرمایید:                                                                                                                            |  |                              |  |  |
| مرد                                                                                                                                                                                  |  | قطعی                         |  |  |
| زن                                                                                                                                                                                   |  |                              |  |  |
| گاهی                                                                                                                                                                                 |  | زیر ۲۲ سال                   |  |  |
| مستمر                                                                                                                                                                                |  | ۲۳-۲۵ سال                    |  |  |
|                                                                                                                                                                                      |  | ۲۶-۳۰ سال                    |  |  |
|                                                                                                                                                                                      |  | بالای ۳۰ سال                 |  |  |
| کارشناسی                                                                                                                                                                             |  | کارشناسی ارشد                |  |  |
| کارشناسی ارشد                                                                                                                                                                        |  | PhD                          |  |  |
| دکتری عمومی                                                                                                                                                                          |  |                              |  |  |
| خوابگاهی                                                                                                                                                                             |  | غیر خوابگاهی:                |  |  |
| <input type="checkbox"/>                                                                                                                                                             |  | <input type="checkbox"/>     |  |  |
| خانه مستقل (مجردی)                                                                                                                                                                   |  | <input type="checkbox"/>     |  |  |
| خانه گروهی (مجردی)                                                                                                                                                                   |  | <input type="checkbox"/>     |  |  |
| با خانواده                                                                                                                                                                           |  | <input type="checkbox"/>     |  |  |

|                                                                                                                                                                                                                  |                                                                                                                            |                                                                                                                          |                                                      |                                                                                                                          |  |                                                                                                                                                                       |  |
|------------------------------------------------------------------------------------------------------------------------------------------------------------------------------------------------------------------|----------------------------------------------------------------------------------------------------------------------------|--------------------------------------------------------------------------------------------------------------------------|------------------------------------------------------|--------------------------------------------------------------------------------------------------------------------------|--|-----------------------------------------------------------------------------------------------------------------------------------------------------------------------|--|
| ب: ازدیدگاه شما مصرف الکل در جامعه دانشجویی به چه میزان مورد قبول است؟<br><input type="checkbox"/> کم <input type="checkbox"/> متوسط <input type="checkbox"/> زیاد <input type="checkbox"/> زیاد                 |                                                                                                                            |                                                                                                                          |                                                      |                                                                                                                          |  | ماده مصرفی                                                                                                                                                            |  |
|                                                                                                                                                                                                                  |                                                                                                                            |                                                                                                                          |                                                      |                                                                                                                          |  | مصرف کننده الکل<br><input type="checkbox"/> بلی <input type="checkbox"/> خیر                                                                                          |  |
| الف: آیا دوست دانشجویی در دانشگاههای علوم پزشکی تهران/البرز می شناسید که در شش ماه اخیر حداقل یکبار مواد الکلی (مثل الکل، ودکا، ویسکی، شراب، آبجو و ...) رامصرف کرده باشد، چه برای تفریح و چه بصورت مستمر        |                                                                                                                            | ج: اگر بله لطفا تعداد را در زیر گروههای زیر بیان فرمایید:                                                                |                                                      | <input type="checkbox"/> گاهی <input type="checkbox"/> مرد<br><input type="checkbox"/> مستمر <input type="checkbox"/> زن |  |                                                                                                                                                                       |  |
| <input type="checkbox"/> خوابگاهی<br><input type="checkbox"/> غیر خوابگاهی:<br><input type="checkbox"/> خانه مستقل (مجردی)<br><input type="checkbox"/> خانه گروهی (مجردی)<br><input type="checkbox"/> با خانواده | <input type="checkbox"/> کارشناسی<br><input type="checkbox"/> کارشناسی ارشد<br>PhD<br><input type="checkbox"/> دکتری عمومی | <input type="checkbox"/><br><input type="checkbox"/><br><input type="checkbox"/><br><input type="checkbox"/>             | زیر ۲۲ سال<br>۲۳-۲۵ سال<br>۲۶-۳۰ سال<br>بالای ۳۰ سال |                                                                                                                          |  |                                                                                                                                                                       |  |
| ب: ازدیدگاه شما مصرف تریاک در جامعه دانشجویی به چه میزان مورد قبول است؟<br><input type="checkbox"/> کم <input type="checkbox"/> متوسط <input type="checkbox"/> زیاد <input type="checkbox"/> زیاد                |                                                                                                                            |                                                                                                                          |                                                      |                                                                                                                          |  | مصرف کننده تریاک                                                                                                                                                      |  |
|                                                                                                                                                                                                                  |                                                                                                                            |                                                                                                                          |                                                      |                                                                                                                          |  | الف : آیا دوست دانشجویی در دانشگاههای علوم پزشکی تهران/البرز می شناسید که در شش ماه اخیر حداقل یکبار تریاک استفاده کرده باشد چه برای تفریح و چه به دلیل استفاده مستمر |  |
| ج: اگر بله لطفا تعداد را در زیر گروههای زیر بیان فرمایید:                                                                                                                                                        |                                                                                                                            | <input type="checkbox"/> گاهی <input type="checkbox"/> مرد<br><input type="checkbox"/> مستمر <input type="checkbox"/> زن |                                                      |                                                                                                                          |  |                                                                                                                                                                       |  |
| <input type="checkbox"/> خوابگاهی<br><input type="checkbox"/> غیر خوابگاهی:<br><input type="checkbox"/> خانه مستقل (مجردی)<br><input type="checkbox"/> خانه گروهی (مجردی)<br><input type="checkbox"/> با خانواده | <input type="checkbox"/> کارشناسی<br><input type="checkbox"/> کارشناسی ارشد<br>PhD<br><input type="checkbox"/> دکتری عمومی | <input type="checkbox"/><br><input type="checkbox"/><br><input type="checkbox"/><br><input type="checkbox"/>             | زیر ۲۲ سال<br>۲۳-۲۵ سال<br>۲۶-۳۰ سال<br>بالای ۳۰ سال |                                                                                                                          |  |                                                                                                                                                                       |  |

| ب: ازدیدگاه شما مصرف مواد روانگردان در جامعه دانشجویی به چه میزان مورد قبول است؟<br>کم <input type="checkbox"/> متوسط <input type="checkbox"/> زیاد <input type="checkbox"/> |  |                                                                                                                                                                                                                  |  |                                                                                                              | ماده مصرفی                                                                                                                                                              |                                                                 |                                                             |                               |
|------------------------------------------------------------------------------------------------------------------------------------------------------------------------------|--|------------------------------------------------------------------------------------------------------------------------------------------------------------------------------------------------------------------|--|--------------------------------------------------------------------------------------------------------------|-------------------------------------------------------------------------------------------------------------------------------------------------------------------------|-----------------------------------------------------------------|-------------------------------------------------------------|-------------------------------|
|                                                                                                                                                                              |  |                                                                                                                                                                                                                  |  |                                                                                                              | مصرف کننده مواد روانگردان<br>بلی <input type="checkbox"/> خیر <input type="checkbox"/>                                                                                  |                                                                 |                                                             |                               |
| الف: آیا دوست دانشجویی در دانشگاههای علوم پزشکی تهران/البرز می شناسید که در شش ماه اخیر حداقل یکبار LSD آمفتامین ، اکستازی راصرف کرده باشد، چه برای تفنن و چه بصورت مستمر    |  |                                                                                                                                                                                                                  |  |                                                                                                              | ج: اگر بله لطفا تعداد را در زیر گروههای زیر بیان فرمایید:                                                                                                               |                                                                 |                                                             |                               |
| کارشناسی <input type="checkbox"/><br>کارشناسی ارشد <input type="checkbox"/><br>PhD <input type="checkbox"/><br>دکتری عمومی <input type="checkbox"/>                          |  | خوابگاهی <input type="checkbox"/><br>غیر خوابگاهی: <input type="checkbox"/><br>خانه مستقل (مجردی) <input type="checkbox"/><br>خانه گروهی (مجردی) <input type="checkbox"/><br>با خانواده <input type="checkbox"/> |  | <input type="checkbox"/><br><input type="checkbox"/><br><input type="checkbox"/><br><input type="checkbox"/> | زیر ۲۲ سال<br>۲۳-۲۵ سال<br>۲۶-۳۰ سال<br>بالای ۳۰ سال                                                                                                                    | گاهی <input type="checkbox"/><br>مستمر <input type="checkbox"/> | مرد <input type="checkbox"/><br>زن <input type="checkbox"/> | قطعی <input type="checkbox"/> |
| ب: ازدیدگاه شما مصرف شیشه/کرک در جامعه دانشجویی به چه میزان مورد قبول است؟<br>کم <input type="checkbox"/> متوسط <input type="checkbox"/> زیاد <input type="checkbox"/>       |  |                                                                                                                                                                                                                  |  |                                                                                                              | مصرف کننده شیشه/کرک                                                                                                                                                     |                                                                 |                                                             |                               |
|                                                                                                                                                                              |  |                                                                                                                                                                                                                  |  |                                                                                                              | الف : آیا دوست دانشجویی در دانشگاههای علوم پزشکی تهران/البرز می شناسید که در شش ماه اخیر حداقل یکبار شیشه/کرک استفاده کرده باشد چه برای تفنن و چه به دلیل استفاده مستمر |                                                                 |                                                             |                               |
| کارشناسی <input type="checkbox"/><br>کارشناسی ارشد <input type="checkbox"/><br>PhD <input type="checkbox"/><br>دکتری عمومی <input type="checkbox"/>                          |  | خوابگاهی <input type="checkbox"/><br>غیر خوابگاهی: <input type="checkbox"/><br>خانه مستقل (مجردی) <input type="checkbox"/><br>خانه گروهی (مجردی) <input type="checkbox"/><br>با خانواده <input type="checkbox"/> |  | <input type="checkbox"/><br><input type="checkbox"/><br><input type="checkbox"/><br><input type="checkbox"/> | زیر ۲۲ سال<br>۲۳-۲۵ سال<br>۲۶-۳۰ سال<br>بالای ۳۰ سال                                                                                                                    | گاهی <input type="checkbox"/><br>مستمر <input type="checkbox"/> | مرد <input type="checkbox"/><br>زن <input type="checkbox"/> | قطعی <input type="checkbox"/> |

|                                                                                                                                                                                                                  |  |                                                                                                                                                     |  |                                                                                                                                                          |  |                                                                 |  |
|------------------------------------------------------------------------------------------------------------------------------------------------------------------------------------------------------------------|--|-----------------------------------------------------------------------------------------------------------------------------------------------------|--|----------------------------------------------------------------------------------------------------------------------------------------------------------|--|-----------------------------------------------------------------|--|
| ب: ازدیدگاه شما تحت درمان با متادون در جامعه دانشجویی به چه میزان مورد قبول است؟<br><input type="checkbox"/> کم <input type="checkbox"/> متوسط <input type="checkbox"/> زیاد                                     |  |                                                                                                                                                     |  |                                                                                                                                                          |  | ماده مصرفی                                                      |  |
|                                                                                                                                                                                                                  |  |                                                                                                                                                     |  |                                                                                                                                                          |  | تحت درمان با متادون                                             |  |
|                                                                                                                                                                                                                  |  |                                                                                                                                                     |  |                                                                                                                                                          |  | بلی <input type="checkbox"/> خیر <input type="checkbox"/>       |  |
| الف: آیا دوست دانشجویی در دانشگاههای علوم پزشکی تهران/البرز می شناسید که در شش ماه اخیر تحت درمان با متادون باشد.                                                                                                |  | ج: اگر بله لطفا تعداد را در زیر گروههای زیر بیان فرمایید:                                                                                           |  | زیر ۲۲ سال <input type="checkbox"/><br>۲۳-۲۵ سال <input type="checkbox"/><br>۲۶-۳۰ سال <input type="checkbox"/><br>بالای ۳۰ سال <input type="checkbox"/> |  | گاهی <input type="checkbox"/><br>مستمر <input type="checkbox"/> |  |
| خوابگاهی <input type="checkbox"/><br>غیر خوابگاهی: <input type="checkbox"/><br>خانه مستقل (مجردی) <input type="checkbox"/><br>خانه گروهی (مجردی) <input type="checkbox"/><br>با خانواده <input type="checkbox"/> |  | کارشناسی <input type="checkbox"/><br>کارشناسی ارشد <input type="checkbox"/><br>PhD <input type="checkbox"/><br>دکتری عمومی <input type="checkbox"/> |  |                                                                                                                                                          |  | مرد <input type="checkbox"/><br>زن <input type="checkbox"/>     |  |
| ب: ازدیدگاه شما مصرف مواد به روش تزریق در جامعه دانشجویی به چه میزان مورد قبول است؟<br><input type="checkbox"/> کم <input type="checkbox"/> متوسط <input type="checkbox"/> زیاد                                  |  |                                                                                                                                                     |  |                                                                                                                                                          |  | مصرف کننده مصرف کننده مواد به روش تزریق                         |  |
|                                                                                                                                                                                                                  |  |                                                                                                                                                     |  |                                                                                                                                                          |  | بلی <input type="checkbox"/> خیر <input type="checkbox"/>       |  |
| الف: آیا دوست دانشجویی در دانشگاههای علوم پزشکی تهران/البرز می شناسید که در شش ماه اخیر حداقل یکبار مواد به روش تزریق چه برای تفنن و چه بصورت مستمر استفاده کرده باشد.                                           |  | ج: اگر بله لطفا تعداد را در زیر گروههای زیر بیان فرمایید:                                                                                           |  | زیر ۲۲ سال <input type="checkbox"/><br>۲۳-۲۵ سال <input type="checkbox"/><br>۲۶-۳۰ سال <input type="checkbox"/><br>بالای ۳۰ سال <input type="checkbox"/> |  | گاهی <input type="checkbox"/><br>مستمر <input type="checkbox"/> |  |
| خوابگاهی <input type="checkbox"/><br>غیر خوابگاهی: <input type="checkbox"/><br>خانه مستقل (مجردی) <input type="checkbox"/><br>خانه گروهی (مجردی) <input type="checkbox"/><br>با خانواده <input type="checkbox"/> |  | کارشناسی <input type="checkbox"/><br>کارشناسی ارشد <input type="checkbox"/><br>PhD <input type="checkbox"/><br>دکتری عمومی <input type="checkbox"/> |  |                                                                                                                                                          |  | مرد <input type="checkbox"/><br>زن <input type="checkbox"/>     |  |

سوالات مربوط به ارتباطات جنسی و مسایل مربوط به آن

|                                                                                                                                                                                                                                                                                                                                                                                                                                                                                                                                                                                                                                                                                                                                                                                                                                                                                                                                           |                                            |                                                                                                                                                                                                                                                                                                                                                                    |                                     |                                                                                                                                                                                                                                                                                                                                                                    |                                     |                               |                                    |                                |                                    |                                       |                                        |                                        |                              |                                            |                                      |                                            |  |  |                                     |  |                                                                                                                                                                                                                                                                                                                                                                |  |                                     |                               |                                    |                                |                                    |  |                                       |  |
|-------------------------------------------------------------------------------------------------------------------------------------------------------------------------------------------------------------------------------------------------------------------------------------------------------------------------------------------------------------------------------------------------------------------------------------------------------------------------------------------------------------------------------------------------------------------------------------------------------------------------------------------------------------------------------------------------------------------------------------------------------------------------------------------------------------------------------------------------------------------------------------------------------------------------------------------|--------------------------------------------|--------------------------------------------------------------------------------------------------------------------------------------------------------------------------------------------------------------------------------------------------------------------------------------------------------------------------------------------------------------------|-------------------------------------|--------------------------------------------------------------------------------------------------------------------------------------------------------------------------------------------------------------------------------------------------------------------------------------------------------------------------------------------------------------------|-------------------------------------|-------------------------------|------------------------------------|--------------------------------|------------------------------------|---------------------------------------|----------------------------------------|----------------------------------------|------------------------------|--------------------------------------------|--------------------------------------|--------------------------------------------|--|--|-------------------------------------|--|----------------------------------------------------------------------------------------------------------------------------------------------------------------------------------------------------------------------------------------------------------------------------------------------------------------------------------------------------------------|--|-------------------------------------|-------------------------------|------------------------------------|--------------------------------|------------------------------------|--|---------------------------------------|--|
| ارتباطات جنسی                                                                                                                                                                                                                                                                                                                                                                                                                                                                                                                                                                                                                                                                                                                                                                                                                                                                                                                             |                                            | ب: ازدیدگاه شما ارتباط جنسی با جنس مخالف در ازاء پرداخت پول یا تقبل هر گونه هزینه دیگر مالی و یا غیر مالی در جامعه دانشجویی به چه میزان مورد قبول است؟<br>کم <input type="checkbox"/> متوسط <input type="checkbox"/> زیاد <input type="checkbox"/>                                                                                                                 |                                     |                                                                                                                                                                                                                                                                                                                                                                    |                                     |                               |                                    |                                |                                    |                                       |                                        |                                        |                              |                                            |                                      |                                            |  |  |                                     |  |                                                                                                                                                                                                                                                                                                                                                                |  |                                     |                               |                                    |                                |                                    |  |                                       |  |
| - ارتباط جنسی با جنس مخالف                                                                                                                                                                                                                                                                                                                                                                                                                                                                                                                                                                                                                                                                                                                                                                                                                                                                                                                |                                            | بلی <input type="checkbox"/> خیر <input type="checkbox"/>                                                                                                                                                                                                                                                                                                          |                                     |                                                                                                                                                                                                                                                                                                                                                                    |                                     |                               |                                    |                                |                                    |                                       |                                        |                                        |                              |                                            |                                      |                                            |  |  |                                     |  |                                                                                                                                                                                                                                                                                                                                                                |  |                                     |                               |                                    |                                |                                    |  |                                       |  |
| در ازای پرداخت پول و یا تقبل هر گونه هزینه دیگر مالی و یا غیر مالی                                                                                                                                                                                                                                                                                                                                                                                                                                                                                                                                                                                                                                                                                                                                                                                                                                                                        |                                            | ج: اگر بله لطفا تعداد را در زیر گروههای زیر بیان فرمایید:                                                                                                                                                                                                                                                                                                          |                                     |                                                                                                                                                                                                                                                                                                                                                                    |                                     |                               |                                    |                                |                                    |                                       |                                        |                                        |                              |                                            |                                      |                                            |  |  |                                     |  |                                                                                                                                                                                                                                                                                                                                                                |  |                                     |                               |                                    |                                |                                    |  |                                       |  |
| الف: آیا دوست دانشجویی در دانشگاههای علوم پزشکی تهران/البرز می شناسید که در شش ماه گذشته حداقل با یک فرد در ازای پرداخت پول و یا تقبل هر گونه هزینه دیگر مالی و یا غیر مالی ارتباط جنسی داشته است.                                                                                                                                                                                                                                                                                                                                                                                                                                                                                                                                                                                                                                                                                                                                        |                                            | <table border="1"> <tr> <td>گاهی <input type="checkbox"/></td> <td>مرد <input type="checkbox"/></td> <td>قطعی <input type="checkbox"/></td> </tr> <tr> <td>مستمر <input type="checkbox"/></td> <td>زن <input type="checkbox"/></td> <td></td> </tr> </table>                                                                                                       |                                     | گاهی <input type="checkbox"/>                                                                                                                                                                                                                                                                                                                                      | مرد <input type="checkbox"/>        | قطعی <input type="checkbox"/> | مستمر <input type="checkbox"/>     | زن <input type="checkbox"/>    |                                    |                                       |                                        |                                        |                              |                                            |                                      |                                            |  |  |                                     |  |                                                                                                                                                                                                                                                                                                                                                                |  |                                     |                               |                                    |                                |                                    |  |                                       |  |
| گاهی <input type="checkbox"/>                                                                                                                                                                                                                                                                                                                                                                                                                                                                                                                                                                                                                                                                                                                                                                                                                                                                                                             | مرد <input type="checkbox"/>               | قطعی <input type="checkbox"/>                                                                                                                                                                                                                                                                                                                                      |                                     |                                                                                                                                                                                                                                                                                                                                                                    |                                     |                               |                                    |                                |                                    |                                       |                                        |                                        |                              |                                            |                                      |                                            |  |  |                                     |  |                                                                                                                                                                                                                                                                                                                                                                |  |                                     |                               |                                    |                                |                                    |  |                                       |  |
| مستمر <input type="checkbox"/>                                                                                                                                                                                                                                                                                                                                                                                                                                                                                                                                                                                                                                                                                                                                                                                                                                                                                                            | زن <input type="checkbox"/>                |                                                                                                                                                                                                                                                                                                                                                                    |                                     |                                                                                                                                                                                                                                                                                                                                                                    |                                     |                               |                                    |                                |                                    |                                       |                                        |                                        |                              |                                            |                                      |                                            |  |  |                                     |  |                                                                                                                                                                                                                                                                                                                                                                |  |                                     |                               |                                    |                                |                                    |  |                                       |  |
| - ارتباط جنسی با جنس مخالف در خارج از چارچوب ازدواج                                                                                                                                                                                                                                                                                                                                                                                                                                                                                                                                                                                                                                                                                                                                                                                                                                                                                       |                                            | ب: ازدیدگاه شما ارتباط جنسی با جنس مخالف در خارج از چارچوب ازدواج در جامعه دانشجویی به چه میزان مورد قبول است؟ کم <input type="checkbox"/> متوسط <input type="checkbox"/> زیاد <input type="checkbox"/>                                                                                                                                                            |                                     |                                                                                                                                                                                                                                                                                                                                                                    |                                     |                               |                                    |                                |                                    |                                       |                                        |                                        |                              |                                            |                                      |                                            |  |  |                                     |  |                                                                                                                                                                                                                                                                                                                                                                |  |                                     |                               |                                    |                                |                                    |  |                                       |  |
| الف: آیا دوست دانشجویی در دانشگاههای علوم پزشکی تهران/البرز می شناسید که در شش ماه اخیر حداقل با یک فرد در خارج از چارچوب ازدواج ارتباط جنسی داشته است) بدون پرداخت پرداخت پول و یا تقبل هر گونه هزینه دیگر مالی و یا غیر مالی)                                                                                                                                                                                                                                                                                                                                                                                                                                                                                                                                                                                                                                                                                                           |                                            | ج: اگر بله لطفا تعداد را در زیر گروههای زیر بیان فرمایید:                                                                                                                                                                                                                                                                                                          |                                     |                                                                                                                                                                                                                                                                                                                                                                    |                                     |                               |                                    |                                |                                    |                                       |                                        |                                        |                              |                                            |                                      |                                            |  |  |                                     |  |                                                                                                                                                                                                                                                                                                                                                                |  |                                     |                               |                                    |                                |                                    |  |                                       |  |
| <table border="1"> <tr> <td>کارشناسی <input type="checkbox"/></td> <td>خوابگاهی <input type="checkbox"/></td> <td rowspan="4"> <table border="1"> <tr> <td>زیر ۲۲ سال <input type="checkbox"/></td> <td rowspan="4">گاهی <input type="checkbox"/></td> </tr> <tr> <td>۲۳-۲۵ سال <input type="checkbox"/></td> <td rowspan="4">مستمر <input type="checkbox"/></td> </tr> <tr> <td>۲۶-۳۰ سال <input type="checkbox"/></td> </tr> <tr> <td>بالای ۳۰ سال <input type="checkbox"/></td> </tr> </table> </td> </tr> <tr> <td>کارشناسی ارشد <input type="checkbox"/></td> <td>غیر خوابگاهی: <input type="checkbox"/></td> </tr> <tr> <td>PhD <input type="checkbox"/></td> <td>خانه مستقل(مجردی) <input type="checkbox"/></td> </tr> <tr> <td>دکتری عمومی <input type="checkbox"/></td> <td>خانه گروهی(مجردی) <input type="checkbox"/></td> <td></td> </tr> <tr> <td></td> <td>با خانواده <input type="checkbox"/></td> <td></td> </tr> </table> |                                            | کارشناسی <input type="checkbox"/>                                                                                                                                                                                                                                                                                                                                  | خوابگاهی <input type="checkbox"/>   | <table border="1"> <tr> <td>زیر ۲۲ سال <input type="checkbox"/></td> <td rowspan="4">گاهی <input type="checkbox"/></td> </tr> <tr> <td>۲۳-۲۵ سال <input type="checkbox"/></td> <td rowspan="4">مستمر <input type="checkbox"/></td> </tr> <tr> <td>۲۶-۳۰ سال <input type="checkbox"/></td> </tr> <tr> <td>بالای ۳۰ سال <input type="checkbox"/></td> </tr> </table> | زیر ۲۲ سال <input type="checkbox"/> | گاهی <input type="checkbox"/> | ۲۳-۲۵ سال <input type="checkbox"/> | مستمر <input type="checkbox"/> | ۲۶-۳۰ سال <input type="checkbox"/> | بالای ۳۰ سال <input type="checkbox"/> | کارشناسی ارشد <input type="checkbox"/> | غیر خوابگاهی: <input type="checkbox"/> | PhD <input type="checkbox"/> | خانه مستقل(مجردی) <input type="checkbox"/> | دکتری عمومی <input type="checkbox"/> | خانه گروهی(مجردی) <input type="checkbox"/> |  |  | با خانواده <input type="checkbox"/> |  | <table border="1"> <tr> <td>زیر ۲۲ سال <input type="checkbox"/></td> <td>گاهی <input type="checkbox"/></td> </tr> <tr> <td>۲۳-۲۵ سال <input type="checkbox"/></td> <td>مستمر <input type="checkbox"/></td> </tr> <tr> <td>۲۶-۳۰ سال <input type="checkbox"/></td> <td></td> </tr> <tr> <td>بالای ۳۰ سال <input type="checkbox"/></td> <td></td> </tr> </table> |  | زیر ۲۲ سال <input type="checkbox"/> | گاهی <input type="checkbox"/> | ۲۳-۲۵ سال <input type="checkbox"/> | مستمر <input type="checkbox"/> | ۲۶-۳۰ سال <input type="checkbox"/> |  | بالای ۳۰ سال <input type="checkbox"/> |  |
| کارشناسی <input type="checkbox"/>                                                                                                                                                                                                                                                                                                                                                                                                                                                                                                                                                                                                                                                                                                                                                                                                                                                                                                         | خوابگاهی <input type="checkbox"/>          | <table border="1"> <tr> <td>زیر ۲۲ سال <input type="checkbox"/></td> <td rowspan="4">گاهی <input type="checkbox"/></td> </tr> <tr> <td>۲۳-۲۵ سال <input type="checkbox"/></td> <td rowspan="4">مستمر <input type="checkbox"/></td> </tr> <tr> <td>۲۶-۳۰ سال <input type="checkbox"/></td> </tr> <tr> <td>بالای ۳۰ سال <input type="checkbox"/></td> </tr> </table> | زیر ۲۲ سال <input type="checkbox"/> |                                                                                                                                                                                                                                                                                                                                                                    | گاهی <input type="checkbox"/>       |                               | ۲۳-۲۵ سال <input type="checkbox"/> |                                | مستمر <input type="checkbox"/>     | ۲۶-۳۰ سال <input type="checkbox"/>    | بالای ۳۰ سال <input type="checkbox"/>  |                                        |                              |                                            |                                      |                                            |  |  |                                     |  |                                                                                                                                                                                                                                                                                                                                                                |  |                                     |                               |                                    |                                |                                    |  |                                       |  |
| زیر ۲۲ سال <input type="checkbox"/>                                                                                                                                                                                                                                                                                                                                                                                                                                                                                                                                                                                                                                                                                                                                                                                                                                                                                                       | گاهی <input type="checkbox"/>              |                                                                                                                                                                                                                                                                                                                                                                    |                                     |                                                                                                                                                                                                                                                                                                                                                                    |                                     |                               |                                    |                                |                                    |                                       |                                        |                                        |                              |                                            |                                      |                                            |  |  |                                     |  |                                                                                                                                                                                                                                                                                                                                                                |  |                                     |                               |                                    |                                |                                    |  |                                       |  |
| ۲۳-۲۵ سال <input type="checkbox"/>                                                                                                                                                                                                                                                                                                                                                                                                                                                                                                                                                                                                                                                                                                                                                                                                                                                                                                        |                                            |                                                                                                                                                                                                                                                                                                                                                                    | مستمر <input type="checkbox"/>      |                                                                                                                                                                                                                                                                                                                                                                    |                                     |                               |                                    |                                |                                    |                                       |                                        |                                        |                              |                                            |                                      |                                            |  |  |                                     |  |                                                                                                                                                                                                                                                                                                                                                                |  |                                     |                               |                                    |                                |                                    |  |                                       |  |
| ۲۶-۳۰ سال <input type="checkbox"/>                                                                                                                                                                                                                                                                                                                                                                                                                                                                                                                                                                                                                                                                                                                                                                                                                                                                                                        |                                            |                                                                                                                                                                                                                                                                                                                                                                    |                                     |                                                                                                                                                                                                                                                                                                                                                                    |                                     |                               |                                    |                                |                                    |                                       |                                        |                                        |                              |                                            |                                      |                                            |  |  |                                     |  |                                                                                                                                                                                                                                                                                                                                                                |  |                                     |                               |                                    |                                |                                    |  |                                       |  |
| بالای ۳۰ سال <input type="checkbox"/>                                                                                                                                                                                                                                                                                                                                                                                                                                                                                                                                                                                                                                                                                                                                                                                                                                                                                                     |                                            |                                                                                                                                                                                                                                                                                                                                                                    |                                     |                                                                                                                                                                                                                                                                                                                                                                    |                                     |                               |                                    |                                |                                    |                                       |                                        |                                        |                              |                                            |                                      |                                            |  |  |                                     |  |                                                                                                                                                                                                                                                                                                                                                                |  |                                     |                               |                                    |                                |                                    |  |                                       |  |
| کارشناسی ارشد <input type="checkbox"/>                                                                                                                                                                                                                                                                                                                                                                                                                                                                                                                                                                                                                                                                                                                                                                                                                                                                                                    | غیر خوابگاهی: <input type="checkbox"/>     |                                                                                                                                                                                                                                                                                                                                                                    |                                     |                                                                                                                                                                                                                                                                                                                                                                    |                                     |                               |                                    |                                |                                    |                                       |                                        |                                        |                              |                                            |                                      |                                            |  |  |                                     |  |                                                                                                                                                                                                                                                                                                                                                                |  |                                     |                               |                                    |                                |                                    |  |                                       |  |
| PhD <input type="checkbox"/>                                                                                                                                                                                                                                                                                                                                                                                                                                                                                                                                                                                                                                                                                                                                                                                                                                                                                                              | خانه مستقل(مجردی) <input type="checkbox"/> |                                                                                                                                                                                                                                                                                                                                                                    |                                     |                                                                                                                                                                                                                                                                                                                                                                    |                                     |                               |                                    |                                |                                    |                                       |                                        |                                        |                              |                                            |                                      |                                            |  |  |                                     |  |                                                                                                                                                                                                                                                                                                                                                                |  |                                     |                               |                                    |                                |                                    |  |                                       |  |
| دکتری عمومی <input type="checkbox"/>                                                                                                                                                                                                                                                                                                                                                                                                                                                                                                                                                                                                                                                                                                                                                                                                                                                                                                      | خانه گروهی(مجردی) <input type="checkbox"/> |                                                                                                                                                                                                                                                                                                                                                                    |                                     |                                                                                                                                                                                                                                                                                                                                                                    |                                     |                               |                                    |                                |                                    |                                       |                                        |                                        |                              |                                            |                                      |                                            |  |  |                                     |  |                                                                                                                                                                                                                                                                                                                                                                |  |                                     |                               |                                    |                                |                                    |  |                                       |  |
|                                                                                                                                                                                                                                                                                                                                                                                                                                                                                                                                                                                                                                                                                                                                                                                                                                                                                                                                           | با خانواده <input type="checkbox"/>        |                                                                                                                                                                                                                                                                                                                                                                    |                                     |                                                                                                                                                                                                                                                                                                                                                                    |                                     |                               |                                    |                                |                                    |                                       |                                        |                                        |                              |                                            |                                      |                                            |  |  |                                     |  |                                                                                                                                                                                                                                                                                                                                                                |  |                                     |                               |                                    |                                |                                    |  |                                       |  |
| زیر ۲۲ سال <input type="checkbox"/>                                                                                                                                                                                                                                                                                                                                                                                                                                                                                                                                                                                                                                                                                                                                                                                                                                                                                                       | گاهی <input type="checkbox"/>              |                                                                                                                                                                                                                                                                                                                                                                    |                                     |                                                                                                                                                                                                                                                                                                                                                                    |                                     |                               |                                    |                                |                                    |                                       |                                        |                                        |                              |                                            |                                      |                                            |  |  |                                     |  |                                                                                                                                                                                                                                                                                                                                                                |  |                                     |                               |                                    |                                |                                    |  |                                       |  |
| ۲۳-۲۵ سال <input type="checkbox"/>                                                                                                                                                                                                                                                                                                                                                                                                                                                                                                                                                                                                                                                                                                                                                                                                                                                                                                        | مستمر <input type="checkbox"/>             |                                                                                                                                                                                                                                                                                                                                                                    |                                     |                                                                                                                                                                                                                                                                                                                                                                    |                                     |                               |                                    |                                |                                    |                                       |                                        |                                        |                              |                                            |                                      |                                            |  |  |                                     |  |                                                                                                                                                                                                                                                                                                                                                                |  |                                     |                               |                                    |                                |                                    |  |                                       |  |
| ۲۶-۳۰ سال <input type="checkbox"/>                                                                                                                                                                                                                                                                                                                                                                                                                                                                                                                                                                                                                                                                                                                                                                                                                                                                                                        |                                            |                                                                                                                                                                                                                                                                                                                                                                    |                                     |                                                                                                                                                                                                                                                                                                                                                                    |                                     |                               |                                    |                                |                                    |                                       |                                        |                                        |                              |                                            |                                      |                                            |  |  |                                     |  |                                                                                                                                                                                                                                                                                                                                                                |  |                                     |                               |                                    |                                |                                    |  |                                       |  |
| بالای ۳۰ سال <input type="checkbox"/>                                                                                                                                                                                                                                                                                                                                                                                                                                                                                                                                                                                                                                                                                                                                                                                                                                                                                                     |                                            |                                                                                                                                                                                                                                                                                                                                                                    |                                     |                                                                                                                                                                                                                                                                                                                                                                    |                                     |                               |                                    |                                |                                    |                                       |                                        |                                        |                              |                                            |                                      |                                            |  |  |                                     |  |                                                                                                                                                                                                                                                                                                                                                                |  |                                     |                               |                                    |                                |                                    |  |                                       |  |

سوالات مربوط به ارتباطات جنسی و مسایل مربوط به آن

|                                                                                                                                                                                                                  |  |                                                                                                                                                     |  |                                                                                                              |  |                                                                                                                                                          |  |                                                                 |  |                                                                                                                          |  |
|------------------------------------------------------------------------------------------------------------------------------------------------------------------------------------------------------------------|--|-----------------------------------------------------------------------------------------------------------------------------------------------------|--|--------------------------------------------------------------------------------------------------------------|--|----------------------------------------------------------------------------------------------------------------------------------------------------------|--|-----------------------------------------------------------------|--|--------------------------------------------------------------------------------------------------------------------------|--|
| ب: ازدیدگاه شما ارتباط جنسی با هم جنس در ازای پول در جامعه دانشجویی به چه میزان مورد قبول است؟<br>کم <input type="checkbox"/> متوسط <input type="checkbox"/> زیاد <input type="checkbox"/>                       |  |                                                                                                                                                     |  |                                                                                                              |  | ارتباطات جنسی                                                                                                                                            |  |                                                                 |  |                                                                                                                          |  |
|                                                                                                                                                                                                                  |  |                                                                                                                                                     |  |                                                                                                              |  | دوست دانشجویی که در ازاء پول با هم جنس ارتباط جنسی داشته باشد.                                                                                           |  |                                                                 |  |                                                                                                                          |  |
|                                                                                                                                                                                                                  |  |                                                                                                                                                     |  |                                                                                                              |  | الف : آیا دوست دانشجویی در دانشگاههای علوم پزشکی تهران/البرز می شناسید که در شش ماه گذشته با هم جنس خود در ازاء پول ارتباط جنسی داشته باشد.              |  |                                                                 |  |                                                                                                                          |  |
| ب: ازدیدگاه شما مصرف مواد قبل یا حین روابط جنسی در جامعه دانشجویی به چه میزان مورد قبول است؟<br>کم <input type="checkbox"/> متوسط <input type="checkbox"/> زیاد <input type="checkbox"/>                         |  |                                                                                                                                                     |  |                                                                                                              |  | مصرف مواد قبل یا حین روابط جنسی                                                                                                                          |  |                                                                 |  |                                                                                                                          |  |
|                                                                                                                                                                                                                  |  |                                                                                                                                                     |  |                                                                                                              |  | الف : آیا دوست دانشجویی در دانشگاههای علوم پزشکی تهران/البرز می شناسید که در شش ماه اخیر حداقل یکبار قبل یا حین برقراری روابط جنسی مواد مصرف کرده باشد.  |  |                                                                 |  |                                                                                                                          |  |
| خوابگاهی <input type="checkbox"/><br>غیر خوابگاهی: <input type="checkbox"/><br>خانه مستقل (مجردی) <input type="checkbox"/><br>خانه گروهی (مجردی) <input type="checkbox"/><br>با خانواده <input type="checkbox"/> |  | کارشناسی <input type="checkbox"/><br>کارشناسی ارشد <input type="checkbox"/><br>PhD <input type="checkbox"/><br>دکتری عمومی <input type="checkbox"/> |  | <input type="checkbox"/><br><input type="checkbox"/><br><input type="checkbox"/><br><input type="checkbox"/> |  | زیر ۲۲ سال <input type="checkbox"/><br>۲۳-۲۵ سال <input type="checkbox"/><br>۲۶-۳۰ سال <input type="checkbox"/><br>بالای ۳۰ سال <input type="checkbox"/> |  | گاهی <input type="checkbox"/><br>مستمر <input type="checkbox"/> |  | ج: اگر بله لطفا تعداد را در زیر گروههای زیر بیان فرمایید:<br>مرد <input type="checkbox"/><br>زن <input type="checkbox"/> |  |

لطفاً جهت تحلیل بهتر نتایج به سوالات زیر پاسخ دهید:

سن:  شغل:  جنس: مرد  زن

وضعیت تاهل: مجرد  متاهل  مطلقه/همسر فوت کرده

مقطع تحصیلی: کارشناس  کارشناسی ارشد  دکتری  PhD

محل سکونت: خوابگاهی  زندگی با خانواده  خانه مستقل (مجردی)  خانه گروهی (مجردی)
